# Supplementary material for: CADD: predicting the deleteriousness of variants throughout the human genome
Source: PubMed Central journal article supplement (PMC6323892; doi:10.1093/nar/gky1016), 2018-10-29
Supplement: gky1016_supplemental_files.pdf [file gky1016_supplemental_files.pdf]

## Supplementary Materials

### CADD: Predicting the deleteriousness of variants throughout the human genome

Philipp Rentzsch, Daniela Witten, Gregory M. Cooper, Jay Shendure\*, Martin Kircher\*

\* Correspondence should be addressed to [shendure@uw.edu](mailto:shendure@uw.edu) and [martin.kircher@bihealth.de](mailto:martin.kircher@bihealth.de)

#### ***Variant selection and external data sets***

Variants for **Figures 2** and **S1** were selected from NCBI/NIH ClinVar and ExAC databases. In the pathogenic set, we collected all ClinVar SNVs with clinical significance "pathogenic" as of July 29<sup>th</sup>, 2018. In the neutral set, we collected all SNVs from ExAC that pass the variant quality filter and have mean allele frequency of 5-50%. Variants overlapping between the ClinVar and ExAC sets were removed. All variants were coordinate lifted from GRCh37 to GRCh38 and back using CrossMap (1) to obtain a consistent set for both CADD v1.4 models. Overall, we obtained 31,815 pathogenic and 69,894 neutral variants located on all 22 autosomes or chromosome X. From these, all missense variants were selected based on their Ensembl VEP annotation in CADD v1.4. We calculated the number of missense variants per gene for both pathogenic and neutral sets and randomly drew the smaller number per gene from each set for the missense performance test (leaving 1,288 variants in each set). Missing score values were imputed with median values of all other variants in the two sets. Non-coding variants in **Figure S1A** were selected from all variants in the two set that were available in the Eigen, FunSeq2 (2) and LINSIGHT whole-genome files.

Scores for CADD, DeepSEA and FATHMM-XF (3) were obtained through their respective web servers. CDTS, DANN, Eigen (v1.1), FunSeq2 (v2.1.6), GERP, LINSIGHT, PrimateAI and ReMM (v0.3.1) scores were extracted from genome-wide files provided by the respective authors. PhastCons and PhyloP scores for vertebrates (based on 100 species alignment) were downloaded from UCSC genome browser resources. All other scores (i.e. FATHMM (4), LRT(5), MutationAssessor (6), MutationTaster (7), Polyphen2, PROVEAN (8), REVEL, SIFT, SiPhy(9), VEST (10)) were annotated via dbNSFP.

## ***Annotations in CADD GRCh38***

**Gene annotations:** same processing as for GRCh37 via VEP

**Grantham:** not specific to genome build

**phastCons, phyloP, GERP++:** novel score generated based on multiz100way alignment of hg38 from UCSC genome browser (excluding the human genome sequence in calculation)

**bstatistic (11):** liftover from hg18

**mirSVR (12):** liftover from hg19

**targetScan (13,14):** liftover from hg19

**chromHMM (15):** uses chromHMM 25 state model, ENCODE/Roadmap cell types only

**Encode expression, nucleosome position, histone modification, open chromatin:** Encode reference epigenome data from up to 14 cell types for totalRNAseq, DNase-seq and Chip-Seq of 10 different histone modifications, for each we include one feature with sum across cell types and one feature with maximum across cell types; all signals were log-transformed

**Segway (16):** replaced with Ensembl regulatory build (which is based on a Segway model)

**tOverlapMotifs:** liftover from hg19

**TFBS:** replaced by data from ReMap2 (17), we are counting for every genomic position the number of different TF and the number of TF-cell-type hits

**mutationDensity, nearestMutation:** same processing based on BRAVO/TOPMed freeze 5

**dbscSNV (18):** liftover from hg19

## ***Known variants in CADD***

In interacting with our users, we noted confusion about whether and how CADD integrates information about known variants into its prediction. CADD v1.0 to v1.3 never used information of variant presence, observed population frequencies or patient phenotype derived effect predictions. We only reported variant presence as well as Exome Sequencing Project (ESP) and 1000 Genomes allele frequencies in our annotation files for the convenience of evaluating CADD's performance.

Since recent studies have highlighted the value of variant density information (21), we have added features based on gnomAD/BRAVO in CADD version 1.4. One feature is the distance between the next single nucleotide variants up and downstream (ignoring variants at the site itself). For the second feature set, we count the number of frequent (MAF > 0.05), rare and single occurrence single nucleotide variants in a window of 100, 1000 and 10000 bases around the position of interest. Considering the use of linear models, it is not possible to infer variable positions from the combination of these accumulated counts and the distance feature. Hence, variant frequencies can be used as a potentially orthogonal annotation by CADD users.

## ***Application Program Interface***

In addition to the retrieving CADD scores via our graphical web user interface and offline scoring, it is possible to request SNV scores per variant or for short ranges via an Application Program Interface (API).

All API requests consist of a CADD version and the genome coordinate. The available CADD versions are `v1.0` to `v1.3` and the two v1.4 releases `GRCh37-v1.4` and `GRCh38-v1.4`. If you require annotations, you can add `\_inclAnno` to the version string.

**Single position access:** The request path for SNV access is

`https://cadd.gs.washington.edu/api/v1.0/<CADD-version>/<chrom>:<pos>` which returns a JSON list of the three SNVs at that position. Users can request a single SNV with reference and alternate base given via

`https://cadd.gs.washington.edu/api/v1.0/<CADD-version>/<chrom>:<pos>\_<ref>\_<alt>`. This returns just a single SNV object in a list. In cases where ref or alt are not available, an empty list is returned.

**Range access:** Range access is similar to the SNV range access on the website with the same limitation to 100 contiguous bases. It can be accessed via

`https://cadd.gs.washington.edu/api/v1.0/<chrom>:<start>-<end>`. In contrast to the single position access, this returns a list of lists where the first item contains the field names.

Currently, there is no support for retrieving CADD InDel scores through the API.

**Figure S1**

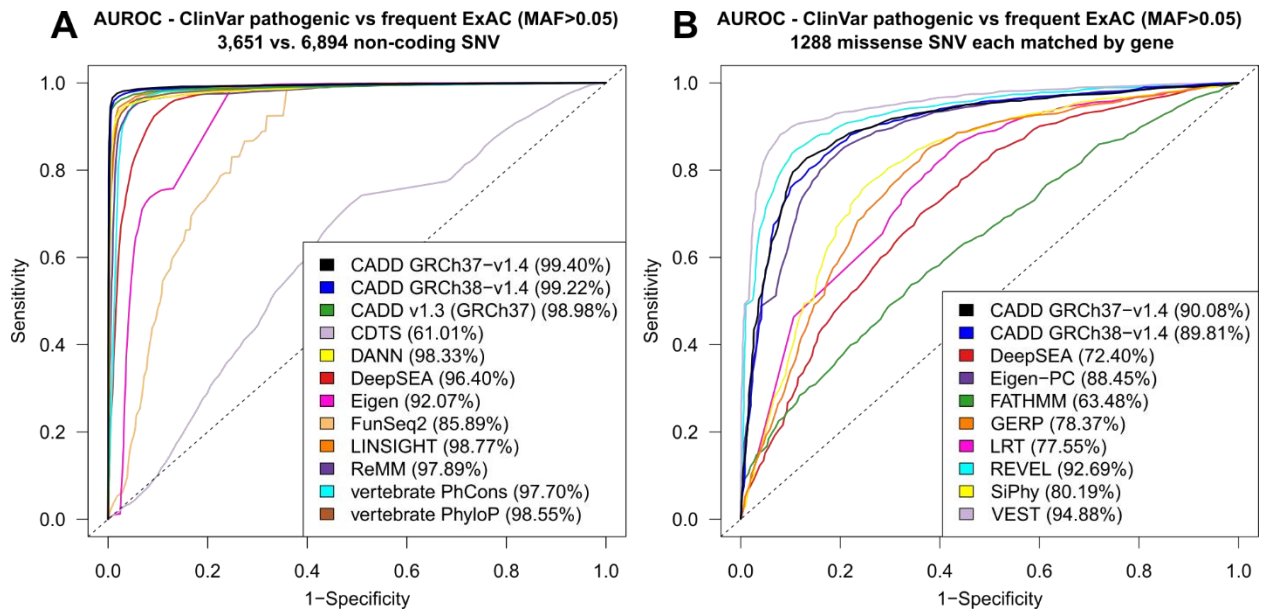

**Non-coding variants and more missense scores:** AUROC performances of different scores on (A) non-coding variants and (B) the same missense variants from **Figure 2B**. Scores from VEST and REVEL are not included in the main comparison because they were trained on variants from these two test sets.

**Figure S2:**

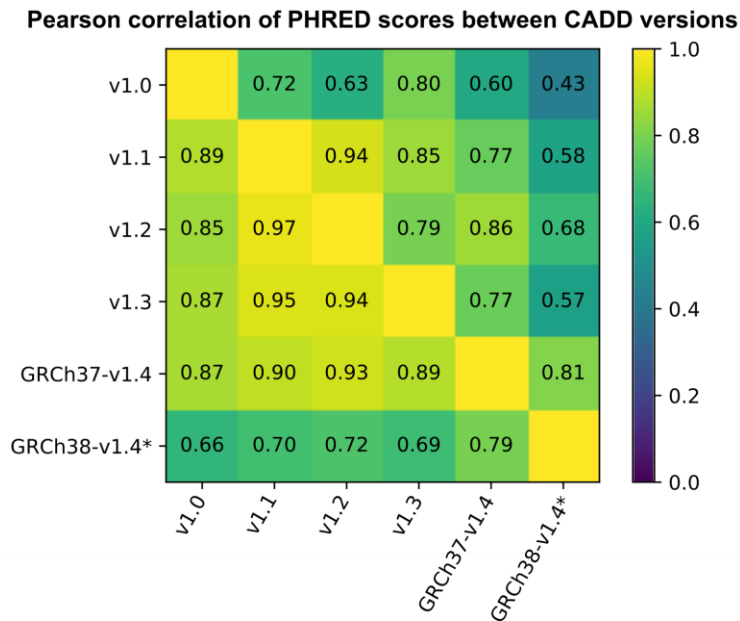

**Correlation between CADD versions:** The plot shows Pearson correlation coefficients of PHRED-scaled scores between the latest six CADD models. GRCh38 scores were lifted to GRCh37 for comparability. Since annotations are not perfectly correlated between genome builds, the GRCh38-v1.4 model is the least correlated to the other models. The figure is based on 100,000 randomly selected SNV throughout the genome (below the diagonal) and only those with PHRED-scaled scores greater than 10 in CADD GRCh37-v1.4 (n=9,923, above the diagonal).

**Table S1: Annotation columns in CADD GRCh37-v1.4**

|    | Name            | Type    | Description                                                                                                                     |
|----|-----------------|---------|---------------------------------------------------------------------------------------------------------------------------------|
| 1  | (Chrom)         | String  | Chromosome                                                                                                                      |
| 2  | (Pos)           | integer | Position (1-based)                                                                                                              |
| 3  | Ref             | factor  | Reference allele (default: N)                                                                                                   |
| 4  | Alt             | factor  | Observed allele (default: N)                                                                                                    |
| 5  | Type            | factor  | Event type (SNV, DEL, INS)                                                                                                      |
| 6  | Length          | integer | Number of inserted/deleted bases                                                                                                |
| 7  | (Annotype)      | factor  | CodingTranscript, Intergenic, MotifFeature, NonCodingTranscript, RegulatoryFeature, Transcript                                  |
| 8  | Consequence     | factor  | VEP consequence, priority selected by potential impact (default: UNKNOWN)                                                       |
| 9  | (ConsScore)     | integer | Custom deleterious score assigned to Consequence                                                                                |
| 10 | (ConsDetail)    | string  | Trimmed VEP consequence prior to simplification                                                                                 |
| 11 | GC              | float   | Percent GC in a window of +/- 75bp (default: 0.42)                                                                              |
| 12 | CpG             | float   | Percent CpG in a window of +/- 75bp (default: 0.02)                                                                             |
| 13 | MotifECount     | integer | Total number of overlapping motifs (default: 0)                                                                                 |
| 14 | (MotifEName)    | string  | Name of sequence motif the position overlaps                                                                                    |
| 15 | MotifEHIPos     | bool    | Is the position considered highly informative for an overlapping motif by VEP (default: 0)                                      |
| 16 | MotifEScoreChng | float   | VEP score change for the overlapping motif site (default: 0)                                                                    |
| 17 | oAA             | factor  | Reference amino acid (default: unknown)                                                                                         |
| 18 | nAA             | factor  | Amino acid of observed variant (default: unknown)                                                                               |
| 19 | (GeneID)        | string  | ENSEMBL GeneID                                                                                                                  |
| 20 | (FeatureID)     | string  | ENSEMBL feature ID (Transcript ID or regulatory feature ID)                                                                     |
| 21 | (GeneName)      | string  | GeneName provided in ENSEMBL annotation                                                                                         |
| 22 | (CCDS)          | string  | Consensus Coding Sequence ID                                                                                                    |
| 23 | (Intron)        | string  | Intron number/Total number of exons                                                                                             |
| 24 | (Exon)          | string  | Exon number/Total number of exons                                                                                               |
| 25 | cDNApos         | float   | Base position from transcription start (default: 0*)                                                                            |
| 26 | relcDNApos      | float   | Relative position in transcript (default: 0)                                                                                    |
| 27 | CDSpos          | float   | Base position from coding start (default: 0*)                                                                                   |
| 28 | relCDSpos       | float   | Relative position in coding sequence (default: 0)                                                                               |
| 29 | protPos         | float   | Amino acid position from coding start (default: 0*)                                                                             |
| 30 | relprotPos      | float   | Relative position in protein codon (default: 0)                                                                                 |
| 31 | Domain          | factor  | Domain annotation inferred from VEP annotation (ncoils, sigp, lcompl, hmmpanther, ndomain = "other named domain") (default: UD) |
| 32 | Dst2Splice      | float   | Distance to splice site in 20bp; positive: exonic, negative: intronic (default: 0)                                              |
| 33 | Dst2SplType     | factor  | Closest splice site is ACCEPTOR or DONOR (default: unknown)                                                                     |
| 34 | MinDistTSS      | float   | Distance to closest Transcribed Sequence Start (TSS) (default: 5.5)                                                             |
| 35 | MinDistTSE      | float   | Distance to closest Transcribed Sequence End (TSE) (default: 5.5)                                                               |
| 36 | SIFTcat         | factor  | SIFT category of change (default: UD)                                                                                           |
| 37 | SIFTval         | float   | SIFT score (default: 0*)                                                                                                        |
| 38 | PolyPhenCat     | factor  | PolyPhen2 category of change (default: UD)                                                                                      |
| 39 | PolyPhenVal     | float   | PolyPhen2 score (default: 0*)                                                                                                   |

|    |                |         |                                                                                                                         |
|----|----------------|---------|-------------------------------------------------------------------------------------------------------------------------|
| 40 | priPhCons      | float   | Primate PhastCons conservation score (excl. human) (default: 0.115)                                                     |
| 41 | mamPhCons      | float   | Mammalian PhastCons conservation score (excl. human) (default: 0.079)                                                   |
| 42 | verPhCons      | float   | Vertebrate PhastCons conservation score (excl. human) (default: 0.094)                                                  |
| 43 | priPhyloP      | float   | Primate PhyloP score (excl. human) (default: -0.033)                                                                    |
| 44 | mamPhyloP      | float   | Mammalian PhyloP score (excl. human) (default: -0.038)                                                                  |
| 45 | verPhyloP      | float   | Vertebrate PhyloP score (excl. human) (default: 0.017)                                                                  |
| 46 | bStatistic     | integer | Background selection score (default: 800)                                                                               |
| 47 | targetScan     | integer | targetscan (default: 0*)                                                                                                |
| 48 | mirSVR-Score   | float   | mirSVR-Score (default: 0*)                                                                                              |
| 49 | mirSVR-E       | float   | mirSVR-E (default: 0)                                                                                                   |
| 50 | mirSVR-Aln     | integer | mirSVR-Aln (default: 0)                                                                                                 |
| 51 | cHmTssA        | float   | Proportion of 127 cell types in cHmTssA state (default: 0.0667*)                                                        |
| 52 | cHmTssAFlnk    | float   | Proportion of 127 cell types in cHmTssAFlnk state (default: 0.0667)                                                     |
| 53 | cHmTxFlnk      | float   | Proportion of 127 cell types in cHmTxFlnk state (default: 0.0667)                                                       |
| 54 | cHmTx          | float   | Proportion of 127 cell types in cHmTx state (default: 0.0667)                                                           |
| 55 | cHmTxWk        | float   | Proportion of 127 cell types in cHmTxWk state (default: 0.0667)                                                         |
| 56 | cHmEnhG        | float   | Proportion of 127 cell types in cHmEnhG state (default: 0.0667)                                                         |
| 57 | cHmEnh         | float   | Proportion of 127 cell types in cHmEnh state (default: 0.0667)                                                          |
| 58 | cHmZnfRpts     | float   | Proportion of 127 cell types in cHmZnfRpts state (default: 0.0667)                                                      |
| 59 | cHmHet         | float   | Proportion of 127 cell types in cHmHet state (default: 0.0667)                                                          |
| 60 | cHmTssBiv      | float   | Proportion of 127 cell types in cHmTssBiv state (default: 0.0667)                                                       |
| 61 | cHmBivFlnk     | float   | Proportion of 127 cell types in cHmBivFlnk state (default: 0.0667)                                                      |
| 62 | cHmEnhBiv      | float   | Proportion of 127 cell types in cHmEnhBiv state (default: 0.0667)                                                       |
| 63 | cHmReprPC      | float   | Proportion of 127 cell types in cHmReprPC state (default: 0.0667)                                                       |
| 64 | cHmReprPCWk    | float   | Proportion of 127 cell types in cHmReprPCWk state (default: 0.0667)                                                     |
| 65 | cHmQuies       | float   | Proportion of 127 cell types in cHmQuies state (default: 0.0667)                                                        |
| 66 | GerpRS         | float   | Gerp element score (default: 0)                                                                                         |
| 67 | GerpRSpval     | float   | Gerp element p-Value (default: 0)                                                                                       |
| 68 | GerpN          | float   | Neutral evolution score defined by GERP++ (default: 1.91)                                                               |
| 69 | GerpS          | float   | Rejected Substitution score defined by GERP++ (default: -0.2)                                                           |
| 70 | TFBS           | float   | Number of different overlapping ChIP transcription factor binding sites (default: 0)                                    |
| 71 | TFBSPeaks      | float   | Number of overlapping ChIP transcription factor binding site peaks summed over different cell types/tissue (default: 0) |
| 72 | TFBSPeaksMax   | float   | Maximum value of overlapping ChIP transcription factor binding site peaks across cell types/tissue (default: 0)         |
| 73 | tOverlapMotifs | float   | Number of overlapping predicted TF motifs (default: 0)                                                                  |
| 74 | motifDist      | float   | Reference minus alternate allele difference in nucleotide frequency within an predicted overlapping motif (default: 0)  |
| 75 | Segway         | factor  | Result of genomic segmentation algorithm (default: unknown)                                                             |
| 76 | EncH3K27Ac     | float   | Maximum ENCODE H3K27 acetylation level (default: 0)                                                                     |
| 77 | EncH3K4Me1     | float   | Maximum ENCODE H3K4 methylation level (default: 0)                                                                      |
| 78 | EncH3K4Me3     | float   | Maximum ENCODE H3K4 trimethylation level (default: 0)                                                                   |
| 79 | EncExp         | float   | Maximum ENCODE expression value (default: 0)                                                                            |
| 80 | EncNucleo      | float   | Maximum of ENCODE Nucleosome position track score (default: 0)                                                          |

|     |                   |         |                                                                                                                  |
|-----|-------------------|---------|------------------------------------------------------------------------------------------------------------------|
| 81  | EncOCC            | integer | ENCODE open chromatin code (default: 5)                                                                          |
| 82  | EncOCCombPVal     | float   | ENCODE combined p-Value (PHRED-scale) of Faire, Dnase, polII, CTCF, Myc evidence for open chromatin (default: 0) |
| 83  | EncOCDNasePVal    | float   | p-Value (PHRED-scale) of Dnase evidence for open chromatin (default: 0)                                          |
| 84  | EncOCFairePVal    | float   | p-Value (PHRED-scale) of Faire evidence for open chromatin (default: 0)                                          |
| 85  | EncOCpolIIPVal    | float   | p-Value (PHRED-scale) of polII evidence for open chromatin (default: 0)                                          |
| 86  | EncOCctcfPVal     | float   | p-Value (PHRED-scale) of CTCF evidence for open chromatin (default: 0)                                           |
| 87  | EncOCmycPVal      | float   | p-Value (PHRED-scale) of Myc evidence for open chromatin (default: 0)                                            |
| 88  | EncOCDNaseSig     | float   | Peak signal for Dnase evidence of open chromatin (default: 0)                                                    |
| 89  | EncOCFaireSig     | float   | Peak signal for Faire evidence of open chromatin (default: 0)                                                    |
| 90  | EncOCpolIISig     | float   | Peak signal for polII evidence of open chromatin (default: 0)                                                    |
| 91  | EncOCctcfSig      | float   | Peak signal for CTCF evidence of open chromatin (default: 0)                                                     |
| 92  | EncOCmycSig       | float   | Peak signal for Myc evidence of open chromatin (default: 0)                                                      |
| 93  | Grantham          | float   | Grantham score: oAA,nAA (default: 0*)                                                                            |
| 94  | Dist2Mutation     | float   | Distance between the closest gnomAD SNV up and downstream (position itself excluded) (default: 0*)               |
| 95  | Freq100bp         | integer | Number of frequent (MAF > 0.05) gnomAD SNV in 100 bp window nearby (default: 0)                                  |
| 96  | Rare100bp         | integer | Number of rare (MAF < 0.05) gnomAD SNV in 100 bp window nearby (default: 0)                                      |
| 97  | Sngl100bp         | integer | Number of single occurrence gnomAD SNV in 100 bp window nearby (default: 0)                                      |
| 98  | Freq1000bp        | integer | Number of frequent (MAF > 0.05) gnomAD SNV in 1000 bp window nearby (default: 0)                                 |
| 99  | Rare1000bp        | integer | Number of rare (MAF < 0.05) gnomAD SNV in 1000 bp window nearby (default: 0)                                     |
| 100 | Sngl1000bp        | integer | Number of single occurrence gnomAD SNV in 1000 bp window nearby (default: 0)                                     |
| 101 | Freq10000bp       | integer | Number of frequent (MAF > 0.05) gnomAD SNV in 10000 bp window nearby (default: 0)                                |
| 102 | Rare10000bp       | integer | Number of rare (MAF < 0.05) gnomAD SNV in 10000 bp window nearby (default: 0)                                    |
| 103 | Sngl10000bp       | integer | Number of single occurrence gnomAD SNV in 10000 bp window nearby (default: 0)                                    |
| 104 | dbscSNV-ada_score | float   | Adaboost classifier score from dbscSNV (default: 0*)                                                             |
| 105 | dbscSNV-rf_score  | float   | Random forest classifier score from dbscSNV (default: 0*)                                                        |
| 106 | RawScore          | float   | Raw score from the model                                                                                         |
| 107 | PHRED             | float   | CADD PHRED Score                                                                                                 |

\* A Boolean indicator variable was created in order to handle undefined values. Note that often indicators represent more than one annotation. They are created for only (the first) one if the covered genomic regions are identical.



**Table S2: Annotations in CADD GRCh38-v1.4**

|    | Name            | Type    | Description                                                                                                                     |
|----|-----------------|---------|---------------------------------------------------------------------------------------------------------------------------------|
| 1  | (Chrom)         | string  | Chromosome                                                                                                                      |
| 2  | (Pos)           | integer | Position (1-based)                                                                                                              |
| 3  | Ref             | factor  | Reference allele (default: N)                                                                                                   |
| 4  | Alt             | factor  | Observed allele (default: N)                                                                                                    |
| 5  | Type            | factor  | Event type (SNV, DEL, INS)                                                                                                      |
| 6  | Length          | integer | Number of inserted/deleted bases                                                                                                |
| 7  | (AnnoType)      | factor  | CodingTranscript, Intergenic, MotifFeature, NonCodingTranscript, RegulatoryFeature, Transcript                                  |
| 8  | Consequence     | factor  | VEP consequence, priority selected by potential impact (default: UNKNOWN)                                                       |
| 9  | (ConsScore)     | integer | Custom deleterious score assigned to Consequence                                                                                |
| 10 | (ConsDetail)    | string  | Trimmed VEP consequence prior to simplification                                                                                 |
| 11 | GC              | float   | Percent GC in a window of +/- 75bp (default: 0.42)                                                                              |
| 12 | CpG             | float   | Percent CpG in a window of +/- 75bp (default: 0.02)                                                                             |
| 13 | motifECount     | integer | Total number of overlapping motifs (default: 0)                                                                                 |
| 14 | (motifEName)    | string  | Name of sequence motif the position overlaps                                                                                    |
| 15 | motifEHIPos     | bool    | Is the position considered highly informative for an overlapping motif by VEP (default: 0)                                      |
| 16 | motifEScoreChng | float   | VEP score change for the overlapping motif site (default: 0)                                                                    |
| 17 | oAA             | factor  | Reference amino acid (default: unknown)                                                                                         |
| 18 | nAA             | factor  | Amino acid of observed variant (default: unknown)                                                                               |
| 19 | (GeneID)        | string  | ENSEMBL GeneID                                                                                                                  |
| 20 | (FeatureID)     | string  | ENSEMBL feature ID (Transcript ID or regulatory feature ID)                                                                     |
| 21 | (GeneName)      | string  | GeneName provided in ENSEMBL annotation                                                                                         |
| 22 | (CCDS)          | string  | Consensus Coding Sequence ID                                                                                                    |
| 23 | (Intron)        | string  | Intron number/Total number of exons                                                                                             |
| 24 | (Exon)          | string  | Exon number/Total number of exons                                                                                               |
| 25 | cDNApos         | float   | Base position from transcription start (default: 0*)                                                                            |
| 26 | relcDNApos      | float   | Relative position in transcript (default: 0)                                                                                    |
| 27 | CDSpos          | float   | Base position from coding start (default: 0*)                                                                                   |
| 28 | relCDSpos       | float   | Relative position in coding sequence (default: 0)                                                                               |
| 29 | protPos         | float   | Amino acid position from coding start (default: 0*)                                                                             |
| 30 | relProtPos      | float   | Relative position in protein codon (default: 0)                                                                                 |
| 31 | Domain          | factor  | Domain annotation inferred from VEP annotation (ncoils, sigp, lcompl, hmmpanther, ndomain = "other named domain") (default: UD) |
| 32 | Dst2Splice      | float   | Distance to splice site in 20bp; positive: exonic, negative: intronic (default: 0)                                              |
| 33 | Dst2SplType     | factor  | Closest splice site is ACCEPTOR or DONOR (default: unknown)                                                                     |
| 34 | minDistTSS      | float   | Distance to closest Transcribed Sequence Start (TSS) (default: 5.5)                                                             |
| 35 | minDistTSE      | float   | Distance to closest Transcribed Sequence End (TSE) (default: 5.5)                                                               |
| 36 | SIFTcat         | factor  | SIFT category of change (default: UD)                                                                                           |
| 37 | SIFTval         | float   | SIFT score (default: 0*)                                                                                                        |

|    |                |         |                                                                         |
|----|----------------|---------|-------------------------------------------------------------------------|
| 38 | PolyPhenCat    | factor  | PolyPhen2 category of change (default: UD)                              |
| 39 | PolyPhenVal    | float   | PolyPhen2 score (default: 0*)                                           |
| 40 | priPhCons      | float   | Primate PhastCons conservation score (excl. human) (default: 0.0)       |
| 41 | mamPhCons      | float   | Mammalian PhastCons conservation score (excl. human) (default: 0.0)     |
| 42 | verPhCons      | float   | Vertebrate PhastCons conservation score (excl. human) (default: 0.0)    |
| 43 | priPhyloP      | float   | Primate PhyloP score (excl. human) (default: -0.029)                    |
| 44 | mamPhyloP      | float   | Mammalian PhyloP score (excl. human) (default: -0.005)                  |
| 45 | verPhyloP      | float   | Vertebrate PhyloP score (excl. human) (default: 0.042)                  |
| 46 | bStatistic     | integer | Background selection score (default: 800)                               |
| 47 | targetScan     | integer | targetscan (default: 0*)                                                |
| 48 | mirSVR-Score   | float   | mirSVR-Score (default: 0*)                                              |
| 49 | mirSVR-E       | float   | mirSVR-E (default: 0)                                                   |
| 50 | mirSVR-Aln     | integer | mirSVR-Aln (default: 0)                                                 |
| 51 | cHmm_E1        | float   | Number of 48 cell types in chromHMM state E1_poised (default: 1.92*)    |
| 52 | cHmm_E2        | float   | Number of 48 cell types in chromHMM state E2_repressed (default: 1.92)  |
| 53 | cHmm_E3        | float   | Number of 48 cell types in chromHMM state E3_dead (default: 1.92)       |
| 54 | cHmm_E4        | float   | Number of 48 cell types in chromHMM state E4_dead (default: 1.92)       |
| 55 | cHmm_E5        | float   | Number of 48 cell types in chromHMM state E5_repressed (default: 1.92)  |
| 56 | cHmm_E6        | float   | Number of 48 cell types in chromHMM state E6_repressed (default: 1.92)  |
| 57 | cHmm_E7        | float   | Number of 48 cell types in chromHMM state E7_weak (default: 1.92)       |
| 58 | cHmm_E8        | float   | Number of 48 cell types in chromHMM state E8_gene (default: 1.92)       |
| 59 | cHmm_E9        | float   | Number of 48 cell types in chromHMM state E9_gene (default: 1.92)       |
| 60 | cHmm_E10       | float   | Number of 48 cell types in chromHMM state E10_gene (default: 1.92)      |
| 61 | cHmm_E11       | float   | Number of 48 cell types in chromHMM state E11_gene (default: 1.92)      |
| 62 | cHmm_E12       | float   | Number of 48 cell types in chromHMM state E12_distal (default: 1.92)    |
| 63 | cHmm_E13       | float   | Number of 48 cell types in chromHMM state E13_distal (default: 1.92)    |
| 64 | cHmm_E14       | float   | Number of 48 cell types in chromHMM state E14_distal (default: 1.92)    |
| 65 | cHmm_E15       | float   | Number of 48 cell types in chromHMM state E15_weak (default: 1.92)      |
| 66 | cHmm_E16       | float   | Number of 48 cell types in chromHMM state E16_tss (default: 1.92)       |
| 67 | cHmm_E17       | float   | Number of 48 cell types in chromHMM state E17_proximal (default: 1.92)  |
| 68 | cHmm_E18       | float   | Number of 48 cell types in chromHMM state E18_proximal (default: 1.92)  |
| 69 | cHmm_E19       | float   | Number of 48 cell types in chromHMM state E19_tss (default: 1.92)       |
| 70 | cHmm_E20       | float   | Number of 48 cell types in chromHMM state E20_poised (default: 1.92)    |
| 71 | cHmm_E21       | float   | Number of 48 cell types in chromHMM state E21_dead (default: 1.92)      |
| 72 | cHmm_E22       | float   | Number of 48 cell types in chromHMM state E22_repressed (default: 1.92) |
| 73 | cHmm_E23       | float   | Number of 48 cell types in chromHMM state E23_weak (default: 1.92)      |
| 74 | cHmm_E24       | float   | Number of 48 cell types in chromHMM state E24_distal (default: 1.92)    |
| 75 | cHmm_E25       | float   | Number of 48 cell types in chromHMM state E25_distal (default: 1.92)    |
| 76 | GerpRS         | float   | Gerp element score (default: 0)                                         |
| 77 | GerpRSpval     | float   | Gerp element p-Value (default: 0)                                       |
| 78 | GerpN          | float   | Neutral evolution score defined by GERP++ (default: 3.0)                |
| 79 | GerpS          | float   | Rejected Substitution score defined by GERP++ (default: -0.2)           |
| 80 | tOverlapMotifs | float   | Number of overlapping predicted TF motifs                               |

|     |                    |         |                                                                                                                        |
|-----|--------------------|---------|------------------------------------------------------------------------------------------------------------------------|
| 81  | motifDist          | float   | Reference minus alternate allele difference in nucleotide frequency within an predicted overlapping motif (default: 0) |
| 82  | EncodeH3K4me1-sum  | float   | Sum of Encode H3K4me1 levels (from 13 cell lines) (default: 0.76)                                                      |
| 83  | EncodeH3K4me1-max  | float   | Maximum Encode H3K4me1 level (from 13 cell lines) (default: 0.37)                                                      |
| 84  | EncodeH3K4me2-sum  | float   | Sum of Encode H3K4me2 levels (from 14 cell lines) (default: 0.73)                                                      |
| 85  | EncodeH3K4me2-max  | float   | Maximum Encode H3K4me2 level (from 14 cell lines) (default: 0.37)                                                      |
| 86  | EncodeH3K4me3-sum  | float   | Sum of Encode H3K4me3 levels (from 14 cell lines) (default: 0.81)                                                      |
| 87  | EncodeH3K4me3-max  | float   | Maximum Encode H3K4me3 level (from 14 cell lines) (default: 0.38)                                                      |
| 88  | EncodeH3K9ac-sum   | float   | Sum of Encode H3K9ac levels (from 13 cell lines) (default: 0.82)                                                       |
| 89  | EncodeH3K9ac-max   | float   | Maximum Encode H3K9ac level (from 13 cell lines) (default: 0.41)                                                       |
| 90  | EncodeH3K9me3-sum  | float   | Sum of Encode H3K9me3 levels (from 14 cell lines) (default: 0.81)                                                      |
| 91  | EncodeH3K9me3-max  | float   | Maximum Encode H3K9me3 level (from 14 cell lines) (default: 0.38)                                                      |
| 92  | EncodeH3K27ac-sum  | float   | Sum of Encode H3K27ac levels (from 14 cell lines) (default: 0.74)                                                      |
| 93  | EncodeH3K27ac-max  | float   | Maximum Encode H3K27ac level (from 14 cell lines) (default: 0.36)                                                      |
| 94  | EncodeH3K27me3-sum | float   | Sum of Encode H3K27me3 levels (from 14 cell lines) (default: 0.93)                                                     |
| 95  | EncodeH3K27me3-max | float   | Maximum Encode H3K27me3 level (from 14 cell lines) (default: 0.47)                                                     |
| 96  | EncodeH3K36me3-sum | float   | Sum of Encode H3K36me3 levels (from 10 cell lines) (default: 0.71)                                                     |
| 97  | EncodeH3K36me3-max | float   | Maximum Encode H3K36me3 level (from 10 cell lines) (default: 0.39)                                                     |
| 98  | EncodeH3K79me2-sum | float   | Sum of Encode H3K79me2 levels (from 13 cell lines) (default: 0.64)                                                     |
| 99  | EncodeH3K79me2-max | float   | Maximum Encode H3K79me2 level (from 13 cell lines) (default: 0.34)                                                     |
| 100 | EncodeH4K20me1-sum | float   | Sum of Encode H4K20me1 levels (from 11 cell lines) (default: 0.88)                                                     |
| 101 | EncodeH4K20me1-max | float   | Maximum Encode H4K20me1 level (from 11 cell lines) (default: 0.47)                                                     |
| 102 | EncodeH2AFZ-sum    | float   | Sum of Encode H2AFZ levels (from 13 cell lines) (default: 0.9)                                                         |
| 103 | EncodeH2AFZ-max    | float   | Maximum Encode H2AFZ level (from 13 cell lines) (default: 0.42)                                                        |
| 104 | EncodeDNase-sum    | float   | Sum of Encode DNase-seq levels (from 12 cell lines) (default: 0.0)                                                     |
| 105 | EncodeDNase-max    | float   | Maximum Encode DNase-seq level (from 12 cell lines) (default: 0.0)                                                     |
| 106 | EncodetotalRNA-sum | float   | Sum of Encode totalRNA-seq levels (from 10 cell lines always minus and plus strand) (default: 0.0)                     |
| 107 | EncodetotalRNA-max | float   | Maximum Encode totalRNA-seq level (from 10 cell lines, minus and plus strand separately) (default: 0.0)                |
| 108 | Grantham           | float   | Grantham score: oAA,nAA (default: 0*)                                                                                  |
| 109 | Dist2Mutation      | float   | Distance between the closest BRAVO SNV up and downstream (position itself excluded) (default: 0*)                      |
| 110 | Freq100bp          | integer | Number of frequent (MAF > 0.05) BRAVO SNV in 100 bp window nearby (default: 0)                                         |
| 111 | Rare100bp          | integer | Number of rare (MAF < 0.05) BRAVO SNV in 100 bp window nearby (default: 0)                                             |
| 112 | Sngl100bp          | integer | Number of single occurrence BRAVO SNV in 100 bp window nearby (default: 0)                                             |
| 113 | Freq1000bp         | integer | Number of frequent (MAF > 0.05) BRAVO SNV in 1000 bp window nearby (default: 0)                                        |
| 114 | Rare1000bp         | integer | Number of rare (MAF < 0.05) BRAVO SNV in 1000 bp window nearby (default: 0)                                            |
| 115 | Sngl1000bp         | integer | Number of single occurrence BRAVO SNV in 1000 bp window nearby (default: 0)                                            |
| 116 | Freq10000bp        | integer | Number of frequent (MAF > 0.05) BRAVO SNV in 10000 bp window nearby (default: 0)                                       |

|     |                            |         |                                                                                                 |
|-----|----------------------------|---------|-------------------------------------------------------------------------------------------------|
| 117 | Rare10000bp                | integer | Number of rare (MAF < 0.05) BRAVO SNV in 10000 bp window nearby (default: 0)                    |
| 118 | Sngl10000bp                | integer | Number of single occurrence BRAVO SNV in 10000 bp window nearby (default: 0)                    |
| 119 | EnsembleRegulatory-Feature | factor  | Matches in the Ensemble Regulatory Built (similar to annotype) (default: NA)                    |
| 120 | dbscSNV-ada_score          | float   | Adaboost classifier score from dbscSNV (default: 0*)                                            |
| 121 | dbscSNV-rf_score           | float   | Random forest classifier score from dbscSNV (default: 0*)                                       |
| 122 | RemapOverlapTF             | integer | Remap number of different transcription factors binding (default: -0.5)                         |
| 123 | RemapOverlapCL             | integer | Remap number of different transcription factor - cell line combinations binding (default: -0.5) |
| 124 | RawScore                   | float   | Raw score from the model                                                                        |
| 125 | PHRED                      | float   | CADD PHRED Score                                                                                |

\* A Boolean indicator variable was created in order to handle undefined values. Note that often indicators represent more than one annotation. They are created for only (the first) one if the covered genomic regions are identical.

**Table S3: Changes in the annotations**

| Annotation                                           | Introduced | Citation/Comment                                                                                    |
|------------------------------------------------------|------------|-----------------------------------------------------------------------------------------------------|
| ChromHMM                                             | v1.1       | (15)                                                                                                |
| DNA shape factor                                     | v1.1       | (19), Led to overfitting and has unclear definition for InDels, therefore removed in v1.4           |
| miRNA binding site prediction (mirSVR & targetScan ) | v1.1       | (12) & (13,14)                                                                                      |
| Mutation Index                                       | v1.1       | (20), Removed in v1.4 as it uses human reference sequence (and derived alleles) in its calculation. |
| VEP domain annotation                                | v1.1       |                                                                                                     |
| Mutation density (gnomAD)                            | v1.4       | Based on BRAVO in GRCh38                                                                            |
| Splice prediction (dbscSNV )                         | v1.4       | (18)                                                                                                |

## References

1. Zhao,H., Sun,Z., Wang,J., Huang,H., Kocher,J. and Wang,L. (2014) CrossMap: a versatile tool for coordinate conversion between genome assemblies. *Bioinformatics*, **30**, 1006–1007.
2. Fu,Y., Liu,Z., Lou,S., Bedford,J., Mu,X.J., Yip,K.Y., Khurana,E. and Gerstein,M. (2014) FunSeq2: a framework for prioritizing noncoding regulatory variants in cancer. *Genome Biol.*, **15**, 480.
3. Rogers,M.F., Shihab,H.A., Mort,M., Cooper,D.N., Gaunt,T.R. and Campbell,C. FATHMM-XF: accurate prediction of pathogenic point mutations via extended features. *Bioinformatics*, 10.1093/bioinformatics/btx536.
4. Shihab,H.A., Gough,J., Mort,M., Cooper,D.N., Day,I.N.M. and Gaunt,T.R. (2014) Ranking non-synonymous single nucleotide polymorphisms based on disease concepts. *Hum. Genomics*, **8**, 11.
5. Chun,S. and Fay,J.C. (2009) Identification of deleterious mutations within three human genomes. *Genome Res.*, **19**, 1553–1561.
6. Reva,B., Antipin,Y. and Sander,C. (2011) Predicting the functional impact of protein mutations: application to cancer genomics. *Nucleic Acids Res*, **39**, e118–e118.
7. Schwarz,J.M., Cooper,D.N., Schuelke,M. and Seelow,D. (2014) MutationTaster2: mutation prediction for the deep-sequencing age. *Nat Meth*, **11**, 361–362.
8. Choi,Y., Sims,G.E., Murphy,S., Miller,J.R. and Chan,A.P. (2012) Predicting the Functional Effect of Amino Acid Substitutions and Indels. *PLOS ONE*, **7**, e46688.
9. Garber,M., Guttman,M., Clamp,M., Zody,M.C., Friedman,N. and Xie,X. (2009) Identifying novel constrained elements by exploiting biased substitution patterns. *Bioinformatics*, **25**, i54–i62.
10. Douville,C., Masica,D.L., Stenson,P.D., Cooper,D.N., Gygax,D.M., Kim,R., Ryan,M. and Karchin,R. (2016) Assessing the Pathogenicity of Insertion and Deletion Variants with the Variant Effect Scoring Tool (VEST-Indel). *Human Mutation*, **37**, 28–35.
11. McVicker,G., Gordon,D., Davis,C. and Green,P. (2009) Widespread Genomic Signatures of Natural Selection in Hominid Evolution. *PLOS Genetics*, **5**, e1000471.
12. Betel,D., Koppal,A., Agius,P., Sander,C. and Leslie,C. (2010) Comprehensive modeling of microRNA targets predicts functional non-conserved and non-canonical sites. *Genome Biology*, **11**, R90.
13. Lewis,B.P., Burge,C.B. and Bartel,D.P. (2005) Conserved seed pairing, often flanked by adenosines, indicates that thousands of human genes are microRNA targets. *Cell*, **120**, 15–20.
14. Agarwal,V., Bell,G.W., Nam,J. and Bartel,D.P. (2015) Predicting effective microRNA target sites in mammalian mRNAs. *eLife*, 10.7554/eLife.05005.
15. Ernst,J. and Kellis,M. (2017) Chromatin-state discovery and genome annotation with ChromHMM. *Nature Protocols*, **12**, nprot.2017.124.
16. Hoffman,M.M., Buske,O.J., Wang,J., Weng,Z., Bilmes,J.A. and Noble,W.S. (2012) Unsupervised pattern discovery in human chromatin structure through genomic segmentation. *Nat. Methods*, **9**, 473–476.
17. Chèneby,J., Gheorghe,M., Artufel,M., Mathelier,A. and Ballester,B. (2017) ReMap 2018: an updated atlas of regulatory regions from an integrative analysis of DNA-binding ChIP-seq

experiments. *Nucleic Acids Research*, 10.1093/nar/gkx1092.

18. Jian,X., Boerwinkle,E. and Liu,X. (2014) In silico prediction of splice-altering single nucleotide variants in the human genome. *Nucleic Acids Res*, **42**, 13534–13544.

19. Zhou,T., Yang,L., Lu,Y., Dror,I., Dantas Machado,A.C., Ghane,T., Di Felice,R. and Rohs,R. (2013) DNashape: a method for the high-throughput prediction of DNA structural features on a genomic scale. *Nucleic Acids Res.*, **41**, W56-62.

20. Michaelson,J.J., Shi,Y., Gujral,M., Zheng,H., Malhotra,D., Jin,X., Jian,M., Liu,G., Greer,D., Bhandari,A., *et al.* (2012) Whole-Genome Sequencing in Autism Identifies Hot Spots for De Novo Germline Mutation. *Cell*, **151**, 1431–1442.

21. Iulio,J. di, Bartha,I., Wong,E.H.M., Yu,H., Lavrenko,V., Yang,D., Jung,I., Hicks,M.A., Shah,N., Kirkness,E.F., *et al.* (2018) The human noncoding genome defined by genetic diversity. *Nature Genetics*, **50**, 333–337.
